# Supplementary material for: Electron Microscopy Pathology of ADSSL1 Myopathy
Source: PubMed Central journal article supplement — J Clin Neurol. 2016 Nov 17;13(1):105–6. doi: 10.3988/jcn.2017.13.1.105 (PMC5242156; doi:10.3988/jcn.2017.13.1.105), 2016-11-17
Supplement: jcn-13-105-s003.pdf [file jcn-13-105-s003.pdf]

**Supplementary Table 2.** Functionally significant variants in myopathy-related genes

| Gene          | Map       | Ref Seq*       | Variants     |             | dbSNP138    | 1000G<br>(2014 Sep) | SIFT <sup>†</sup> | PolyPhen2 <sup>‡</sup> | Description            |       |       |                        |
|---------------|-----------|----------------|--------------|-------------|-------------|---------------------|-------------------|------------------------|------------------------|-------|-------|------------------------|
|               |           |                | Nucleotides  | Amino acids |             |                     |                   |                        |                        |       |       |                        |
| <i>AGRN1</i>  | 1p36.33   | NM_198576.3    | c.4516G>A    | p.A1506T    | rs200182409 | 0.000               | 0.018             | 0.183                  | Likely benign          |       |       |                        |
| <i>DCTN1</i>  | 2p13      | NM_004082.4    | c.2054T>G    | p.V685G     | -           | -                   | 0.000             | 0.989                  | Uncertain significance |       |       |                        |
| <i>NEB</i>    | 2q22      | NM_001271208.1 | c.3412A>G    | p.N1138D    | rs117048449 | 0.019               | 0.196             | 0.946                  | Likely benign          |       |       |                        |
|               |           |                | c.5102T>C    | p.V1701A    | rs117271684 | 0.019               | 0.29              | 0.621                  | Likely benign          |       |       |                        |
|               |           |                | c.8189A>G    | p.D2730G    | rs76767949  | 0.020               | 0.02              | 0.973                  | Uncertain significance |       |       |                        |
| <i>TTN</i>    | 2q31      | NM_001267550.1 | c.22012G>A   | p.D7338N    | -           | -                   | 0.05              | 0.801                  | Likely benign          |       |       |                        |
|               |           |                | c.82855A>G   | p.T27619A   | -           | -                   | 0.375             | 0.334                  | Likely benign          |       |       |                        |
|               |           |                | c.10931G>A   | p.S3644N    | rs78535378  | 0.016               | 0.636             | 0.000                  | Likely benign          |       |       |                        |
|               |           |                | c.21044C>T   | p.A7015V    | rs72648960  | 0.036               | 0.074             | 0.096                  | Likely benign          |       |       |                        |
|               |           |                | c.39704C>G   | p.P13235R   | rs72650066  | 0.043               | 0.220             | 0.010                  | Likely benign          |       |       |                        |
| <i>DAG1</i>   | 3p21      | NM_001165928.3 | c.98164A>T   | p.I32722F   | rs72648270  | 0.019               | 0.182             | 0.997                  | Likely benign          |       |       |                        |
|               |           |                | c.331G>A     | p.D111N     | rs117209107 | 0.004               | 0.284             | 0.162                  | Likely benign          |       |       |                        |
|               |           |                | <i>FAT1</i>  | 4q35.2      | NM_005245.3 | c.13652C>G          | p.A551G           | rs148468016            | 0.004                  | 0.009 | 1.000 | Uncertain significance |
|               |           |                | <i>MYOT</i>  | 5q31.2      | NM_006790.2 | c.220A>C            | p.K74Q            | rs6890689              | -                      | 1.000 | 1.000 | Uncertain significance |
|               |           |                | <i>LAMA2</i> | 6q22-q23    | NM_000426.3 | c.2438T>C           | p.I813T           | -                      | -                      | 0.461 | 0.001 | Likely benign          |
| <i>ANO5</i>   | 11p14.3   | NM_213599.2    | c.966A>T     | p.L322F     | rs7481951   | -                   | 0.136             | 0.011                  | Likely benign          |       |       |                        |
| <i>TRPV4</i>  | 12q24.11  | NM_021625.4    | c.55C>T      | p.P19S      | rs3742030   | 0.044               | 0.209             | 0.000                  | Likely benign          |       |       |                        |
| <i>ADSSL1</i> | 14q32.33  | NM_199165.1    | c.910G>A     | p.D304N     | rs140614802 | -                   | 0.000             | 1.000                  | Pathogenic             |       |       |                        |
|               |           |                | c.1048delA   | p.I350fs    | rs559454746 | 0.001               | -                 | -                      | Pathogenic             |       |       |                        |
| <i>SYNE2</i>  | 14p23.2   | NM_182914.2    | c.10567A>C   | p.K3523Q    | rs35203186  | 0.039               | 0.618             | 0.006                  | Likely benign          |       |       |                        |
|               |           |                | c.11935C>G   | p.L3979V    | rs76576553  | 0.016               | 0.107             | 0.010                  | Likely benign          |       |       |                        |
| <i>CHRN1</i>  | 17p12-p11 | NM_000747.2    | c.725G>A     | p.R242H     | rs79220301  | 0.001               | 0.006             | 0.984                  | Uncertain significance |       |       |                        |
| <i>COL6A1</i> | 21q22.3   | NM_001848.2    | c.2548C>A    | p.R850S     | rs566453317 | 0.000               | 0.449             | 0.005                  | Likely benign          |       |       |                        |
| <i>DMD</i>    | Xp21.2    | NM_004006.2    | c.3083G>A    | p.R1028H    | -           | -                   | 0.134             | 0.003                  | Likely benign          |       |       |                        |
|               |           |                | c.8729A>T    | p.E2910V    | rs41305353  | 0.036               | 0.003             | 0.119                  | Likely benign          |       |       |                        |
|               |           |                | c.8734A>G    | p.N2912D    | rs1800278   | 0.037               | 0.472             | 0.281                  | Likely benign          |       |       |                        |

\*GenBank registration number of reference sequence, <sup>†</sup>SIFT: <0.05 predicted to be deleterious, <sup>‡</sup>PolyPhen2: -1 indicates prediction of pathogenicity.
